# Supplementary material for: IFIT2 Depletion Promotes Cancer Stem Cell-like Phenotypes in Oral Cancer
Source: MDPI journal article supplement (doi:10.3390/biomedicines11030896), 2023-03-14
Supplement: s1 [file s1]

Table S1. Primer sequences of CSC markers for quantitative real-time PCR analysis.

| <b>Gene</b> | <b>Forward primer</b>      | <b>Reverse primer</b>     |
|-------------|----------------------------|---------------------------|
| OCT3/4      | 5-GAAGGTATTCAGCCAAACGA-3'  | 5-AAATTCTCCAGGTTGCCTCT-3' |
| NANOG       | 5-ACCAGACCTGGAACAAGTTCA-3' | 5-ATGCAGGACTGCAGAGATTC-3' |
| NESTIN      | 5-CATGGAACCTGGAGAATTTG-3'  | 5-AGCCAGTTCTTGGTCCTTCT-3' |
| ABCG2       | 5-GTTTTTCCCTGACATCGTGGA-3' | 5-CGAGCCTCTTGGTATAGGCG-3' |
| CD24        | 5-ACAGCCAGTCTCTTCGTGGT-3'  | 5-CCTGTTTTTCCTTGCCACAT-3' |
| CD44        | 5-CGGACACCATGGACAAGTTT-3'  | 5-CCGTCCGAGAGATGCTGTAG-3' |
| GAPDH       | 5-GGAGTCCCTGCCACACTCA-3'   | 5-GCCCCTCCCCTCTTCAAG-3'   |
