# Supplementary material for: IFIT2 Depletion Promotes Cancer Stem Cell-like Phenotypes in Oral Cancer
Source: MDPI journal article supplement (doi:10.3390/biomedicines11030896), 2023-03-14
Supplement: s1 [file s1]

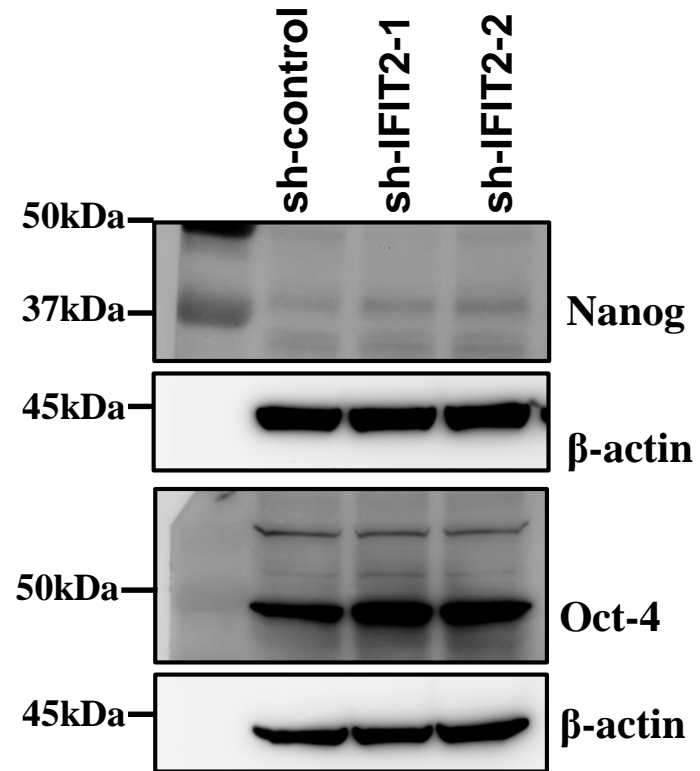

Figure S2. The protein levels of Nanog and Oct-4 in sh-control, sh-IFIT2-1 and sh-IFIT2-2 cells were determined by Western blotting.  $\beta$ -actin was used as an internal control Western blotting.
